# Supplementary material
Source: PubMed Central journal article supplement (PMC5925695)
Supplement: JCM.00050-18_zjm999095914s1.pdf [file JCM.00050-18_zjm999095914s1.pdf]

1 **Multiplex immunochromatographic detection of OXA-48, KPC and NDM carbapenemases:**  
2 **impact of the inoculum, antibiotics and agar**

3

4 Ahmad Saleh<sup>a, c</sup>, Stephan Göttig<sup>b</sup> and Axel Hamprecht<sup>a, c</sup>

5

6 a. Institute for Medical Microbiology, Immunology and Hygiene, University Hospital of Cologne,  
7 Cologne, Germany

8 b. Institute of Medical Microbiology and Infection Control, Hospital of Johann Wolfgang  
9 Goethe-University, Frankfurt am Main, Germany

10 c. DZIF (German Centre for Infection Research), partner site Cologne-Bonn

11

12

13 **Supplementary Data**

14

15

16

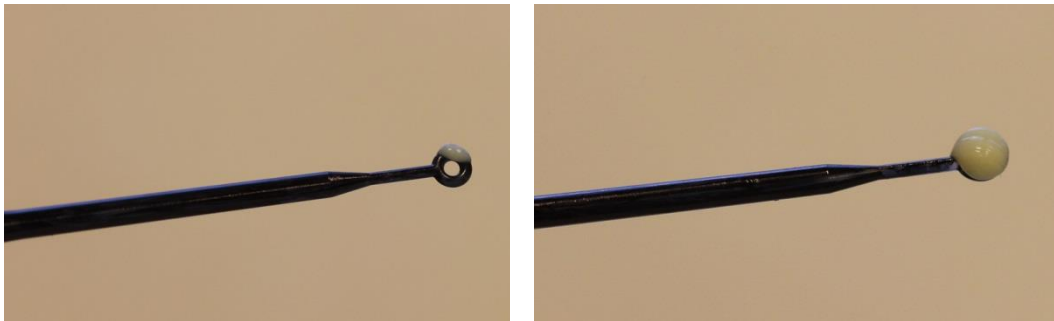

17

18

19 **FIG S1:**

20 Incorrect inoculum (left) vs. correct inoculum (right). A full 1  $\mu$ l loop is required to achieve the highest  
21 sensitivity, especially for NDM.
